# Supplementary material
Source: PubMed Central journal article supplement (PMC3233098)
Supplement: supp_77.24.8754_AEM6162-11_supplemental.pdf [file supp_77.24.8754_AEM6162-11_supplemental.pdf]

**A novel linuron hydrolase identified by genomic-proteomic  
analysis of phenylurea herbicide mineralization by *Variovorax* sp.  
strain SRS16**

*Karolien Bers<sup>1</sup>, Baptiste Leroy<sup>2</sup>, Philip Breugelmans<sup>1</sup>, Pieter Albers<sup>1</sup>, Rob Lavigne<sup>3</sup>,  
Sebastian R. Sørensen<sup>4</sup>, Jens Aamand<sup>4</sup>, René De Mot<sup>5</sup>, Ruddy Wattiez<sup>2</sup> & Dirk Springael<sup>1\*</sup>*

Division of Soil and Water Management, Katholieke Universiteit Leuven, Kasteelpark  
Arenberg 20, 3001 Leuven, Belgium<sup>1</sup>, Department of Proteomics and Protein Biochemistry,  
University of Mons-Hainaut, Av. du Champs de Mars 6, 7000 Mons, Belgium<sup>2</sup>, Laboratory  
of Gene Technology, Katholieke Universiteit Leuven, Kasteelpark Arenberg 21 box 2462,  
3001 Leuven, Belgium<sup>3</sup>, Department of Geochemistry, Geological Survey of Denmark and  
Greenland (GEUS), Øster Voldgade 10, 1350 Copenhagen K, Denmark<sup>4</sup> and Centre of  
Microbial and Plant Genetics, Katholieke Universiteit Leuven, Kasteelpark Arenberg 20,  
3001 Leuven, Belgium<sup>5</sup>

\*Corresponding author. Mailing address: Division of Soil and Water Management,  
Katholieke Universiteit Leuven, Kasteelpark Arenberg 20, 3001 Leuven, Belgium  
Phone: +3216321609. Fax +3216321997. E-mail: [Dirk.Springael@ees.kuleuven.be](mailto:Dirk.Springael@ees.kuleuven.be).

## **Supplemental material 1**

**Specification of methodology followed in Southern blotting of linuron/3,4-DCA-degrading bacteria for the presence of *libA*.** The hybridization temperature was 62°C and strong, medium and weak hybridization solutions (5XSSC, 0.1% sodium lauroylsarcosine and 0.02% SDS) contained 50, 20 or 0% formamide and 5, 2 and 2% blocking agent respectively. After hybridization the membrane was washed twice in low stringent solution (2 x SSC, 0.1% SDS) (5 min, room temperature) and twice in high stringent solution (0.1 x SSC, 0.1% SDS) (15 min, 68°C). This allowed to detect DNA that was 90, 75, or 60% similar to the gene probe.

**Supplementary Table 1 Overview of the PCR primer pairs used in this study and their corresponding loci.** The partial amino acid sequences of the amino group transfer protein of the multicomponent aniline dioxygenase in *Variovorax* sp. strains WDL1 (1) and SRS16 (this study) and the amino acid sequences of homologous enzymes in (chloro)aniline degrading Proteobacteria (Genbank accession numbers AAO38206.1, BAD61047.1, ABI20708.1, AAX47239.1, BAA12805.1, BAC82524.1) were used to design primer pair AGT-F/AGT-R. PCR reaction mixtures contained 10 nmol of each dNTP (Invitrogen, Belgium), 25 pmol forward and reverse primer, 1.25 U *Taq* DNA polymerase (Qiagen, Belgium), PCR buffer 1 X (Qiagen, Belgium) and 1  $\mu$ L of template DNA in a final volume of 50  $\mu$ L. PCR reaction conditions were an initial denaturation for 5 min at 94°C, 30 cycles consisting of a denaturation step at 94°C for 1 min, an annealing step at 50°C for 1 min and an extension step at 72°C for 1 min, and a final extension step at 72°C for 10 min.

| Sequence (5'-3')                                   | Target Gene             | Name                                         | Size amplification product (bp) |
|----------------------------------------------------|-------------------------|----------------------------------------------|---------------------------------|
| YBTCDTGGCCGGAYCARTAYGG<br>CATGTAVAGRTCRCGNARCATCCA | <i>dcaQ</i>             | ATG-F<br>ATG-R                               | 272                             |
| CTCTCATGGCCGGATCAATA<br>TACAGATCGGCCAGCATCCA       | <i>dcaQ</i>             | dcaQ-F<br>dcaQ-R                             | 272                             |
| GTACCCGGAGACGAGATCTT<br>ACGCATTCGCCGTGGCTTTT       | <i>dcaT</i>             | dcaT-F<br>dcaT-R                             | 418                             |
| GGTGTACTTGGCCCATGAAA<br>TCCAGATAGCGTGTGGCATT       | <i>dcaA<sub>1</sub></i> | dcaA <sub>1</sub> -F<br>dcaA <sub>1</sub> -R | 392                             |
| GTGGCACAACACTACTGACACT<br>TCGGCCAGAGTGAAGCTGTA     | <i>dcaA<sub>2</sub></i> | dcaA <sub>2</sub> -F<br>dcaA <sub>2</sub> -R | 329                             |
| TTACCGTCACCGCTGTTTCA<br>GCGTCATACCAGTGGCGTAT       | <i>dcaB</i>             | dcaB-F<br>dcaB-R                             | 511                             |
| TACGAAGTTGCAGCCGACAT<br>ACCTGGTCTTGCTCCAGATT       | <i>dcaR</i>             | dcaR-F<br>dcaR-R                             | 347                             |
| GCTACGCCACCTTCGTTATT<br>TGTCCGGTTCGTCTCGATAA       | <i>ccdR</i>             | ccdR-F<br>ccdR-R                             | 458                             |
| TGGAGGGCCCCTATTTTCTA<br>ACTGTGACCCACTTCTCAT        | <i>ccdC</i>             | ccdC-F<br>ccdC-R                             | 425                             |
| TCAGATTTGGCCGAGGTA<br>CGTCCTCTGTGTAGTCTTGA         | <i>ccdF</i>             | ccdF-F<br>ccdF-R                             | 380                             |
| GTCGATCTGCCTCTCAAGAA<br>AGACCTTCTAGCTGCCACTT       | <i>ccdD</i>             | ccdD-F<br>ccdD-R                             | 677                             |
| TGCTGGCACCGGATCTTTAT<br>CCTGCGCTTTGACAGGATAA       | <i>ccdE</i>             | ccdE-F<br>ccdE-R                             | 276                             |
| TCCGAGCACCGCAAATACAT<br>ATTGCATAAAGCGGGCTGT        | <b>ORF 8</b>            | ORF8-F<br>ORF8-R                             | 261                             |
| TGGGCTTTCCCGTTTGCTAT<br>CTTCAGCCGGTCTTGTTCAA       | <b>ORF 9</b>            | ORF9-F<br>ORF9-R                             | 177                             |
| GATATCAAGCCCGTGACCTT<br>CGCTGAGCTTTCCCTCTTTT       | <b>ORF 10</b>           | ORF10-F<br>ORF10-R                           | 226                             |
| TGCTGCAAGCTCTCTTTGCCCT<br>CCAACATCTGACCCCGGTGTTT   | <i>libA</i>             | LinAmidR-F<br>LinAmidR-R                     | 1571                            |

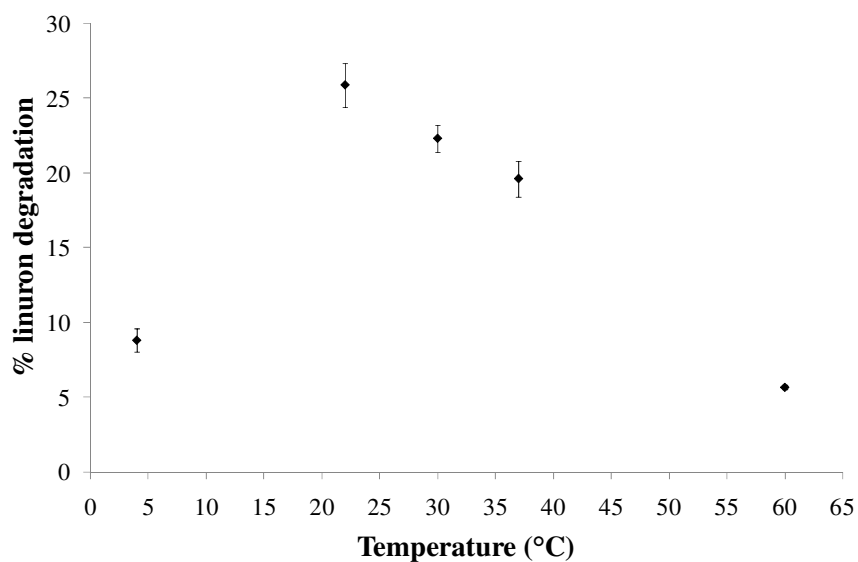

**Supplementary Figure 1 Temperature-dependent activity of linuron hydrolase LibA.**

All tests were performed in duplicate. The Y-axis shows the percentage of linuron degradation ( $50 \text{ mg L}^{-1}$ ) after 1 hour of incubation at the indicated temperature.

**References**

1. Breugelmans, P., B. Leroy, K. Bers, W. Dejonghe, R. Wattiez, R. De Mot, and D. Springael. 2010. Proteomic study of linuron and 3,4-dichloroaniline degradation by *Variovorax* sp. WDL1: evidence for the involvement of an aniline dioxygenase-related multicomponent protein. *Res. Microbiol.* 161:208-218.
